# Supplementary material
Source: publisher figshare collection journal article supplement (https://plos.figshare.com/articles/dataset/_/699116)
Supplement: Supplementary file 1 [file 1 › Figure_S1.pdf]

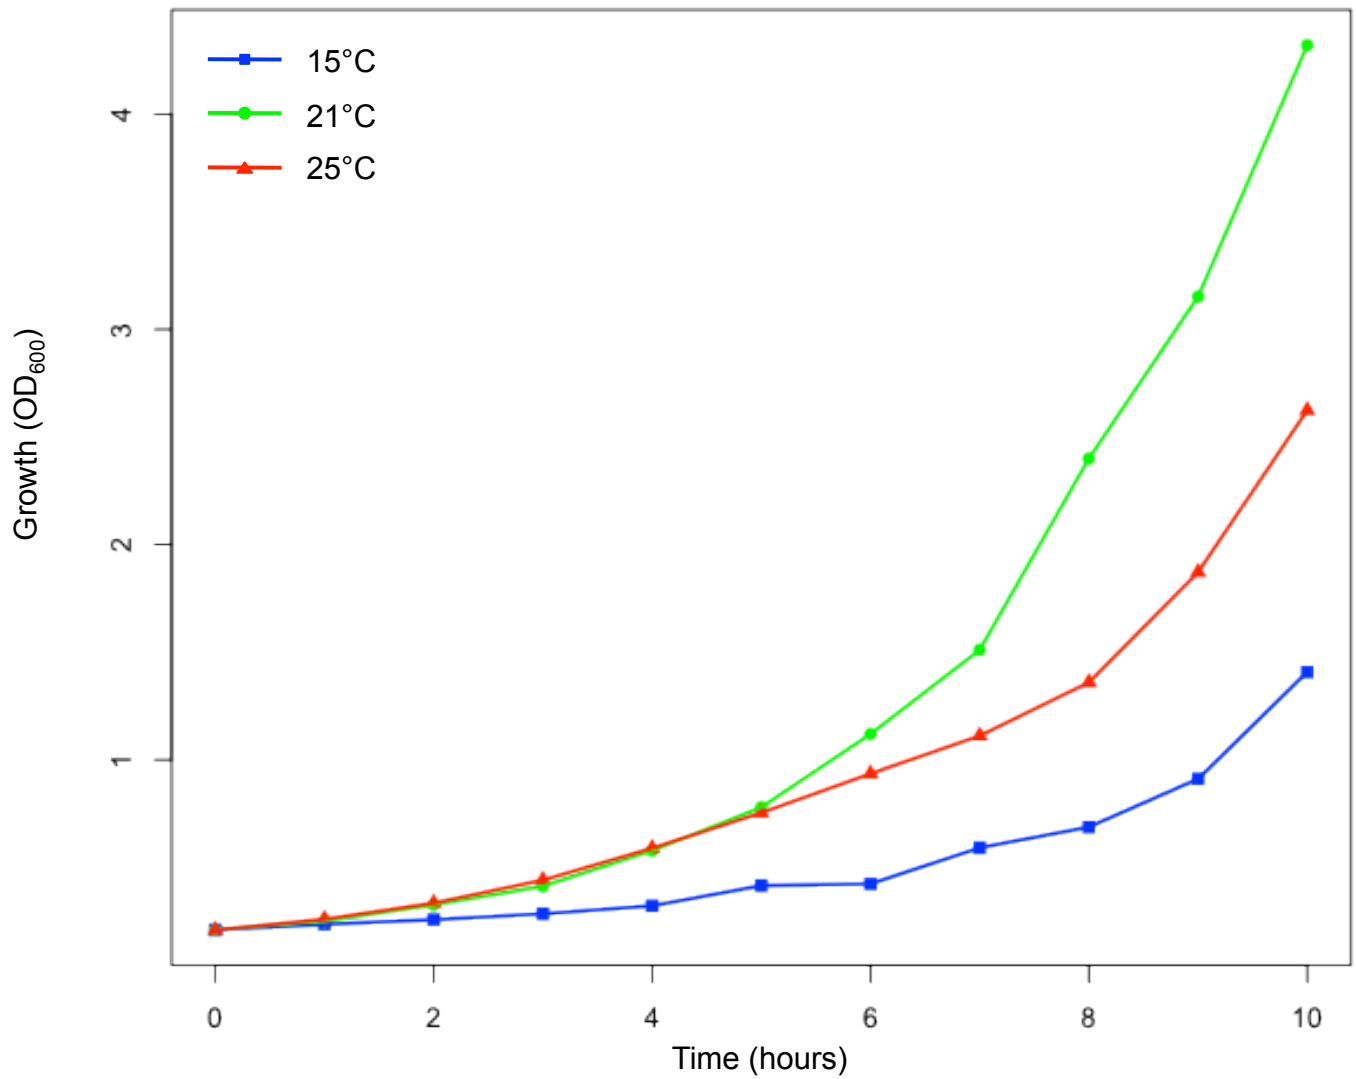

**Additional Figure S1:** Growth curves of YAAL on YPD at different temperatures. The growth curves at 15°C, 21°C and 25°C are represented in blue with squares, in green with dots, and in red with triangles, respectively.
