# Supplementary material
Source: publisher figshare collection journal article supplement (https://plos.figshare.com/articles/dataset/_/699116)
Supplement: Supplementary file 1 [file 1 › Figure_S2.pdf]

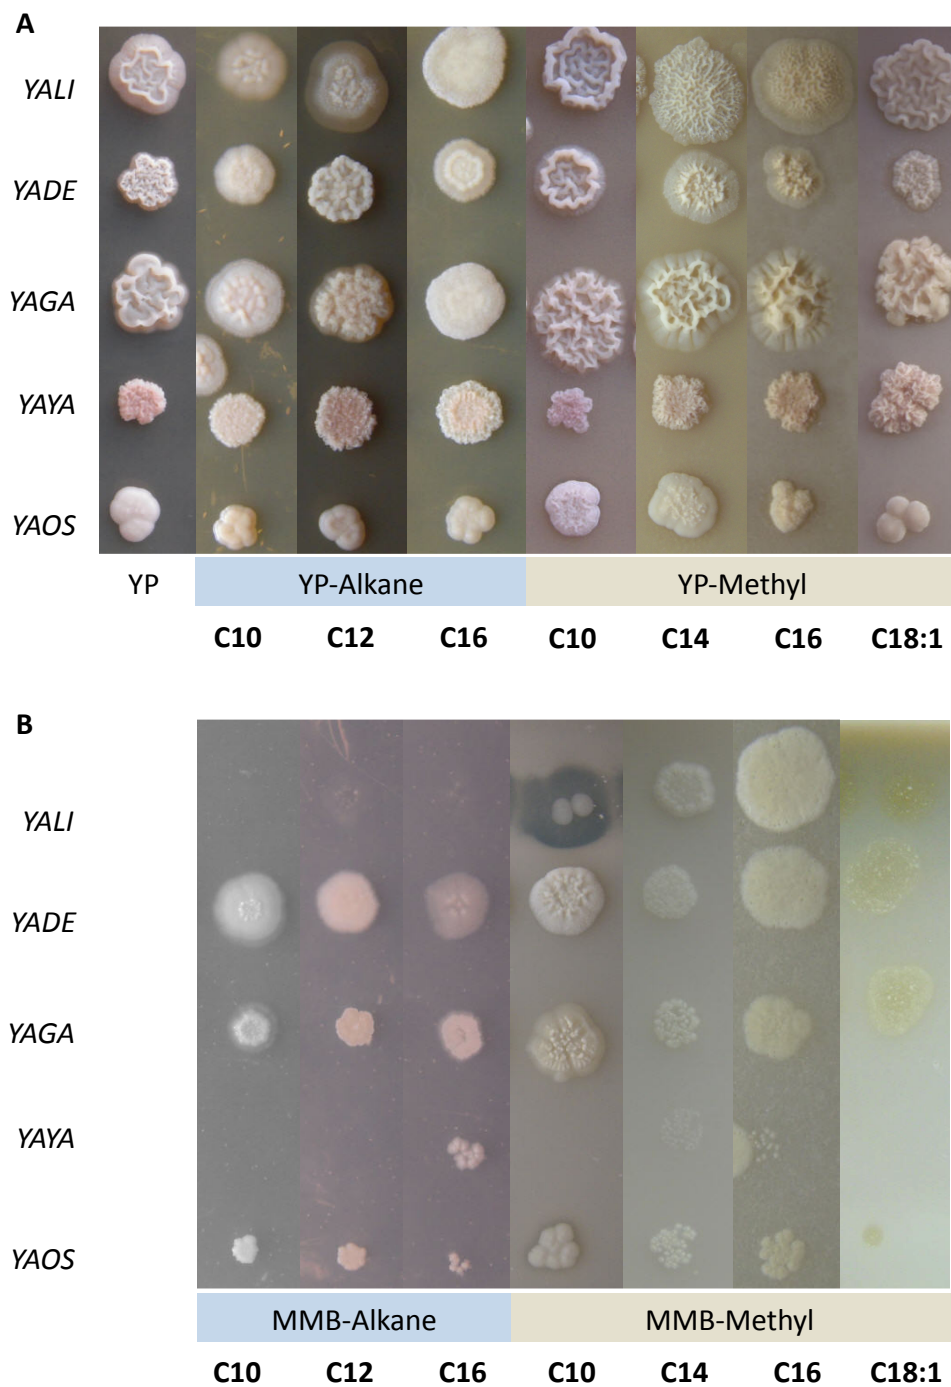

**Additional Figure S2:** Drop tests on YP (A) and MMB (B) media with alkanes and methyl-esters of different chain length. Only one spot is presented for strains *YALI*, *YADE*, *YAGA*, *YAYA* and *YAOS*. Strains are represented by an abbreviation of their species name as shown in Table 1.
