# Supplementary material
Source: publisher figshare collection journal article supplement (https://plos.figshare.com/articles/dataset/_/699116)
Supplement: Supplementary file 1 [file 1 › Figure_S3.pdf]

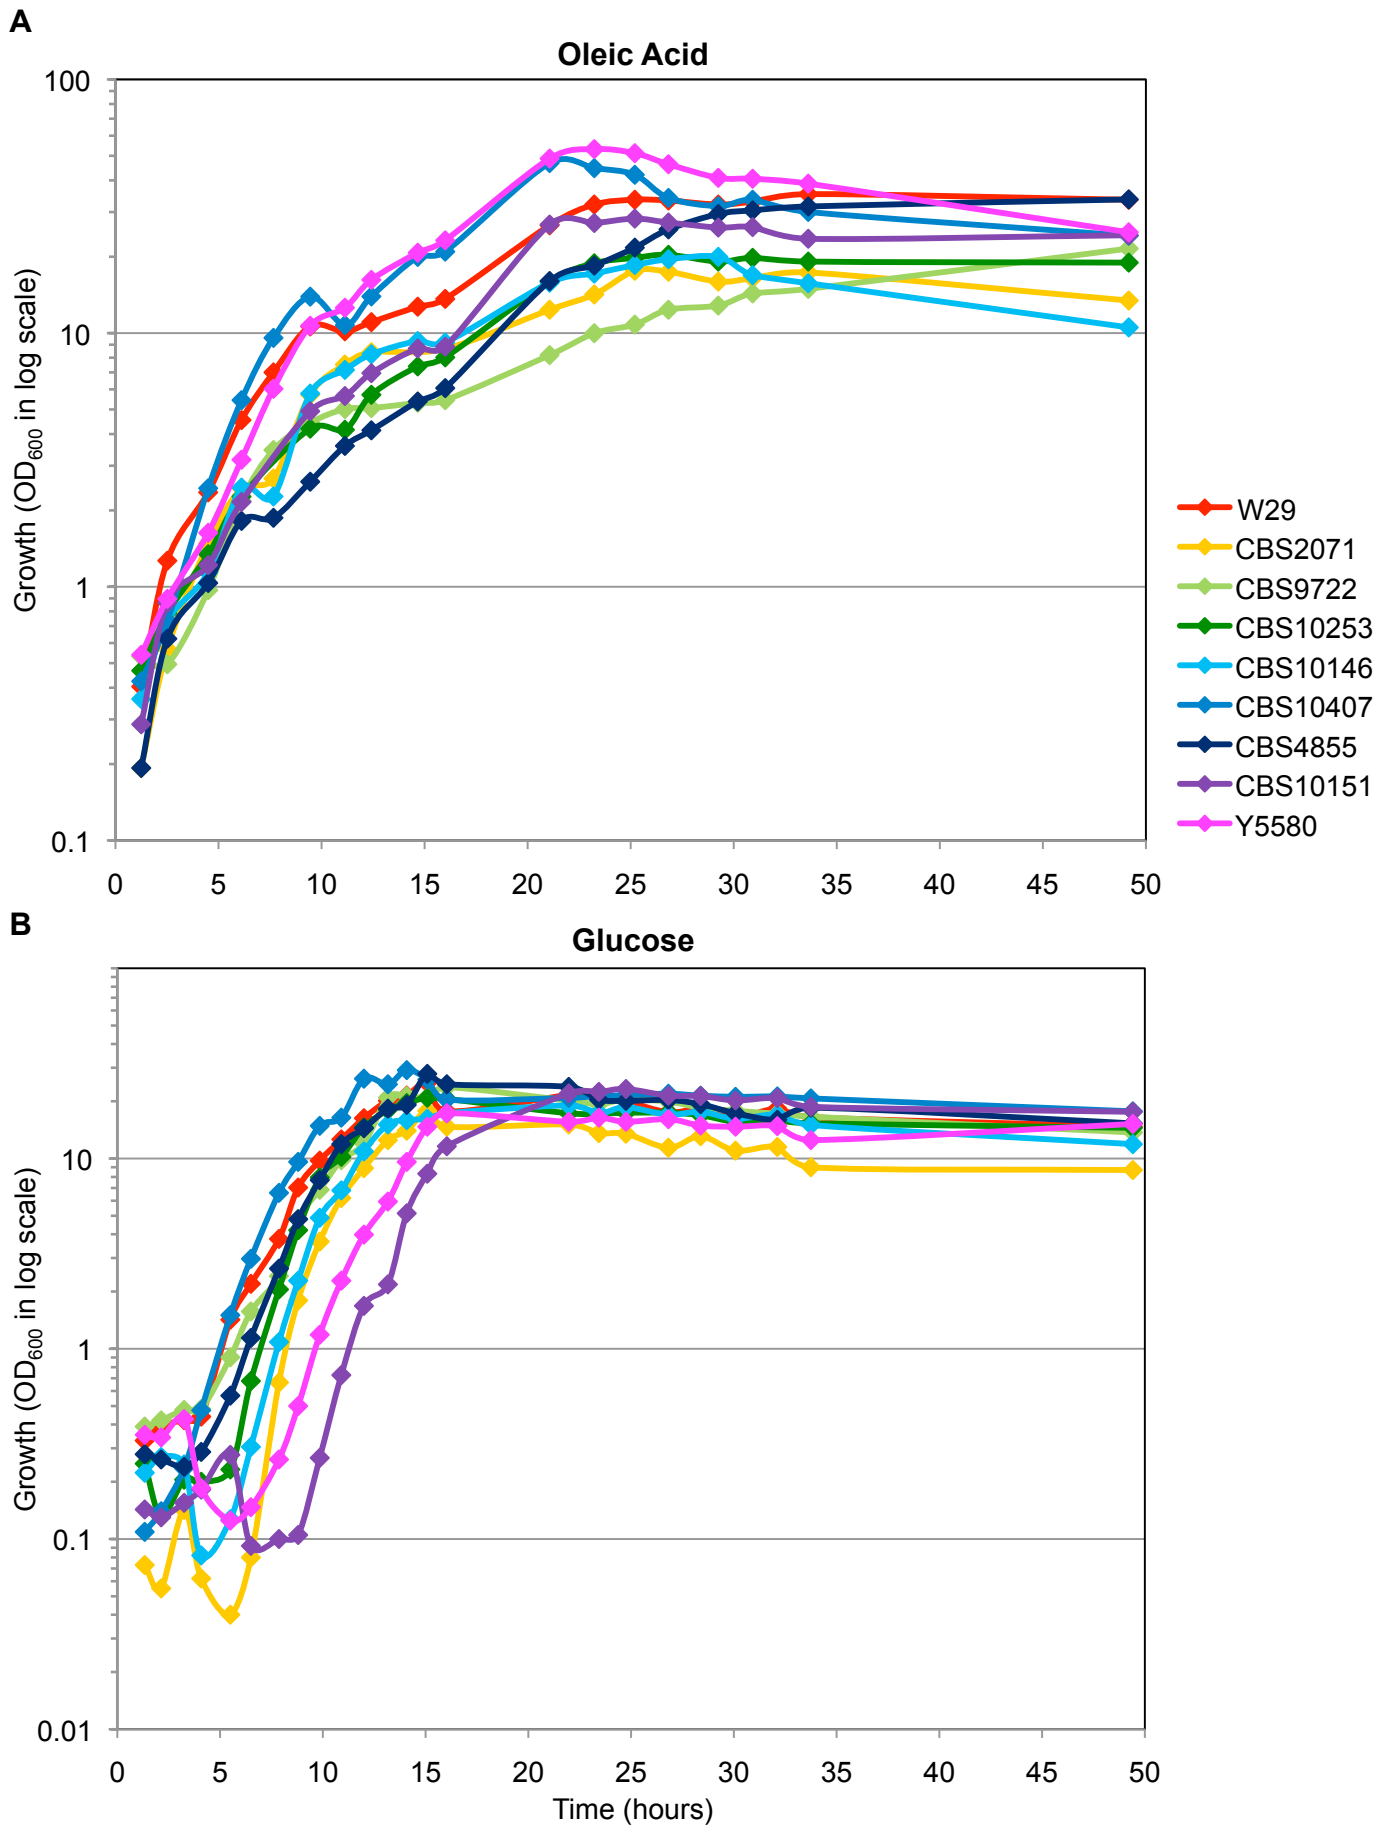

**Additional Figure S3:** Growth curves established on oleic acid 2% (A) and glucose 2% (B) media for the strains of the *Yarrowia* clade during 50 h. Strain names are abbreviated as follows: YALI (*Y. lipolytica* W29), YAYA (*C. yakushimensis* CBS10253), YADE (*C. deformans* CBS2071), YAGA (*C. galli* CBS9722), YAOS (*C. oslonensis* CBS10146), YAHO (*C. hollandica* CBS4855), YAPH (*C. phangngensis* CBS10407), YAAL (*C. alimentaria* CBS10151), YAHJ (*C. hispaniensis* CBS9996).
