# Supplementary material
Source: publisher figshare collection journal article supplement (https://plos.figshare.com/articles/dataset/_/699116)
Supplement: Supplementary file 1 [file 1 › Figure_S4.pdf]

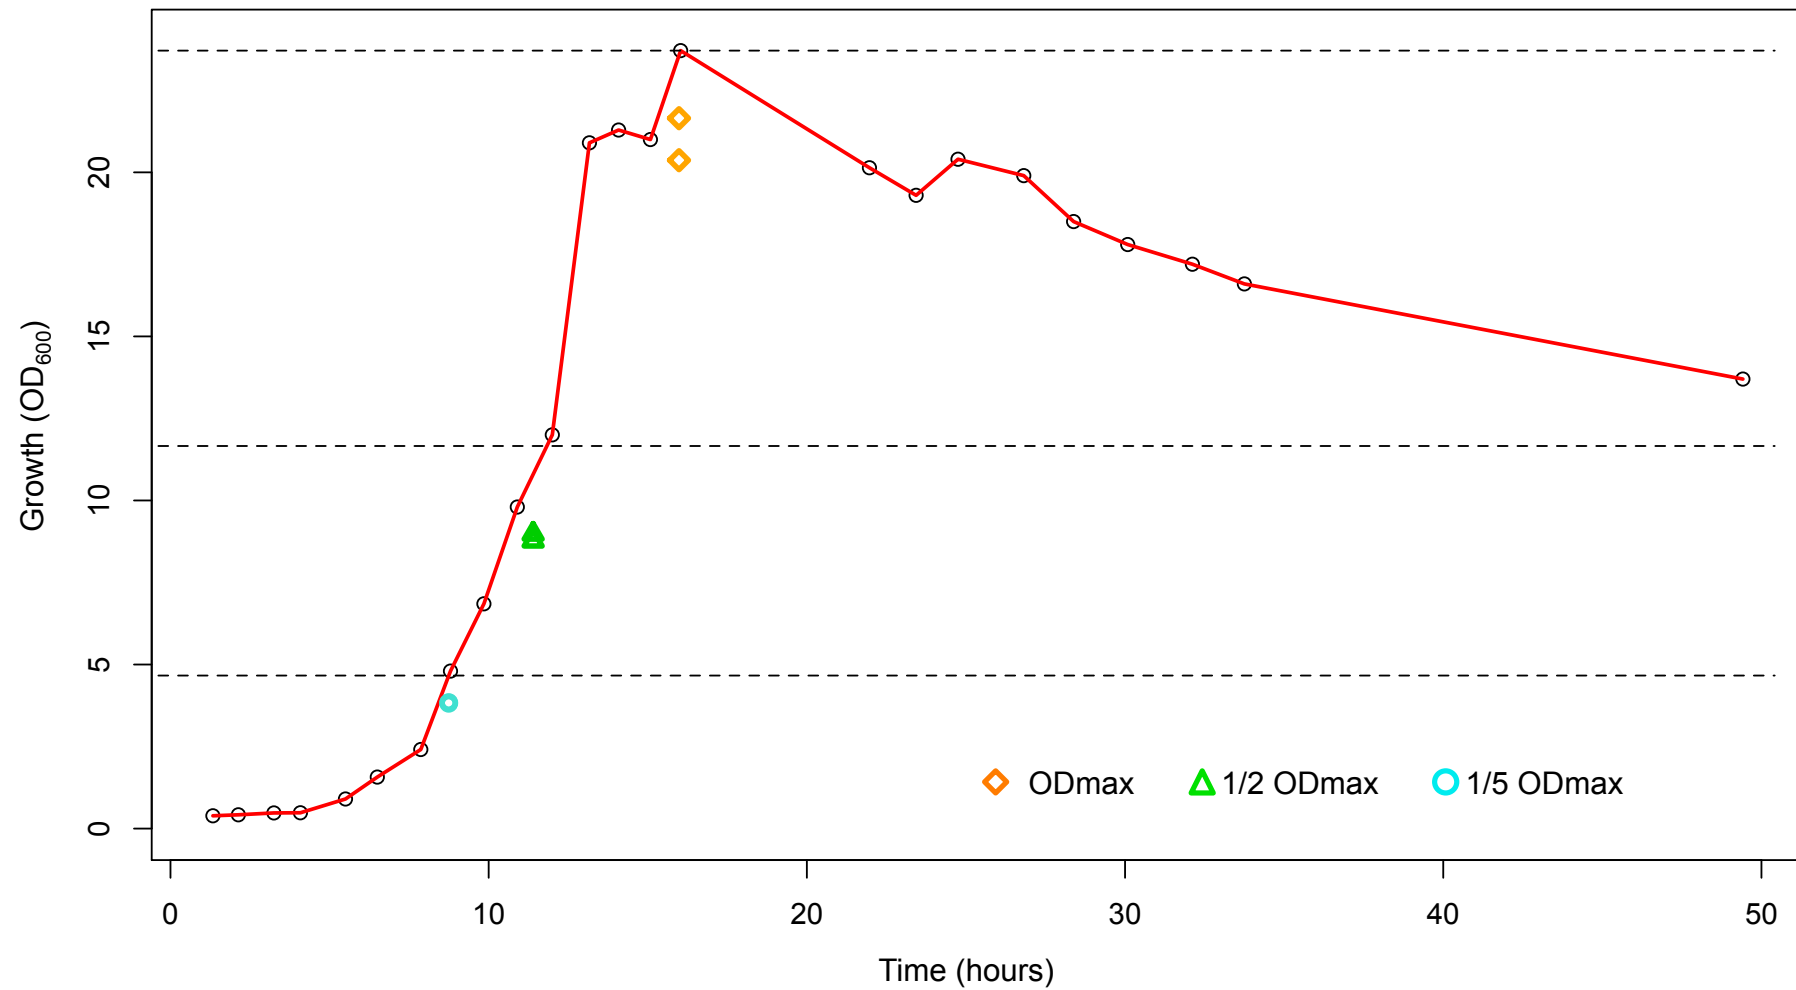

**Additional Figure S4:** Growth curve and time points used for YAGA cultivated on Glucose (2%). Experimental growth curve is in red. Horizontal dotted lines correspond to the maximum OD, to the 1/2 and to the 1/5 of OD max. Circles, triangles and diamonds indicate OD at the time points used for lipid accumulation tests at 4.6 h, 11.6 h and 23.7 h of culture, respectively.
