# Supplementary material
Source: publisher figshare collection journal article supplement (https://plos.figshare.com/articles/dataset/_/699116)
Supplement: Supplementary file 1 [file 1 › Figure_S5.pdf]

**A**

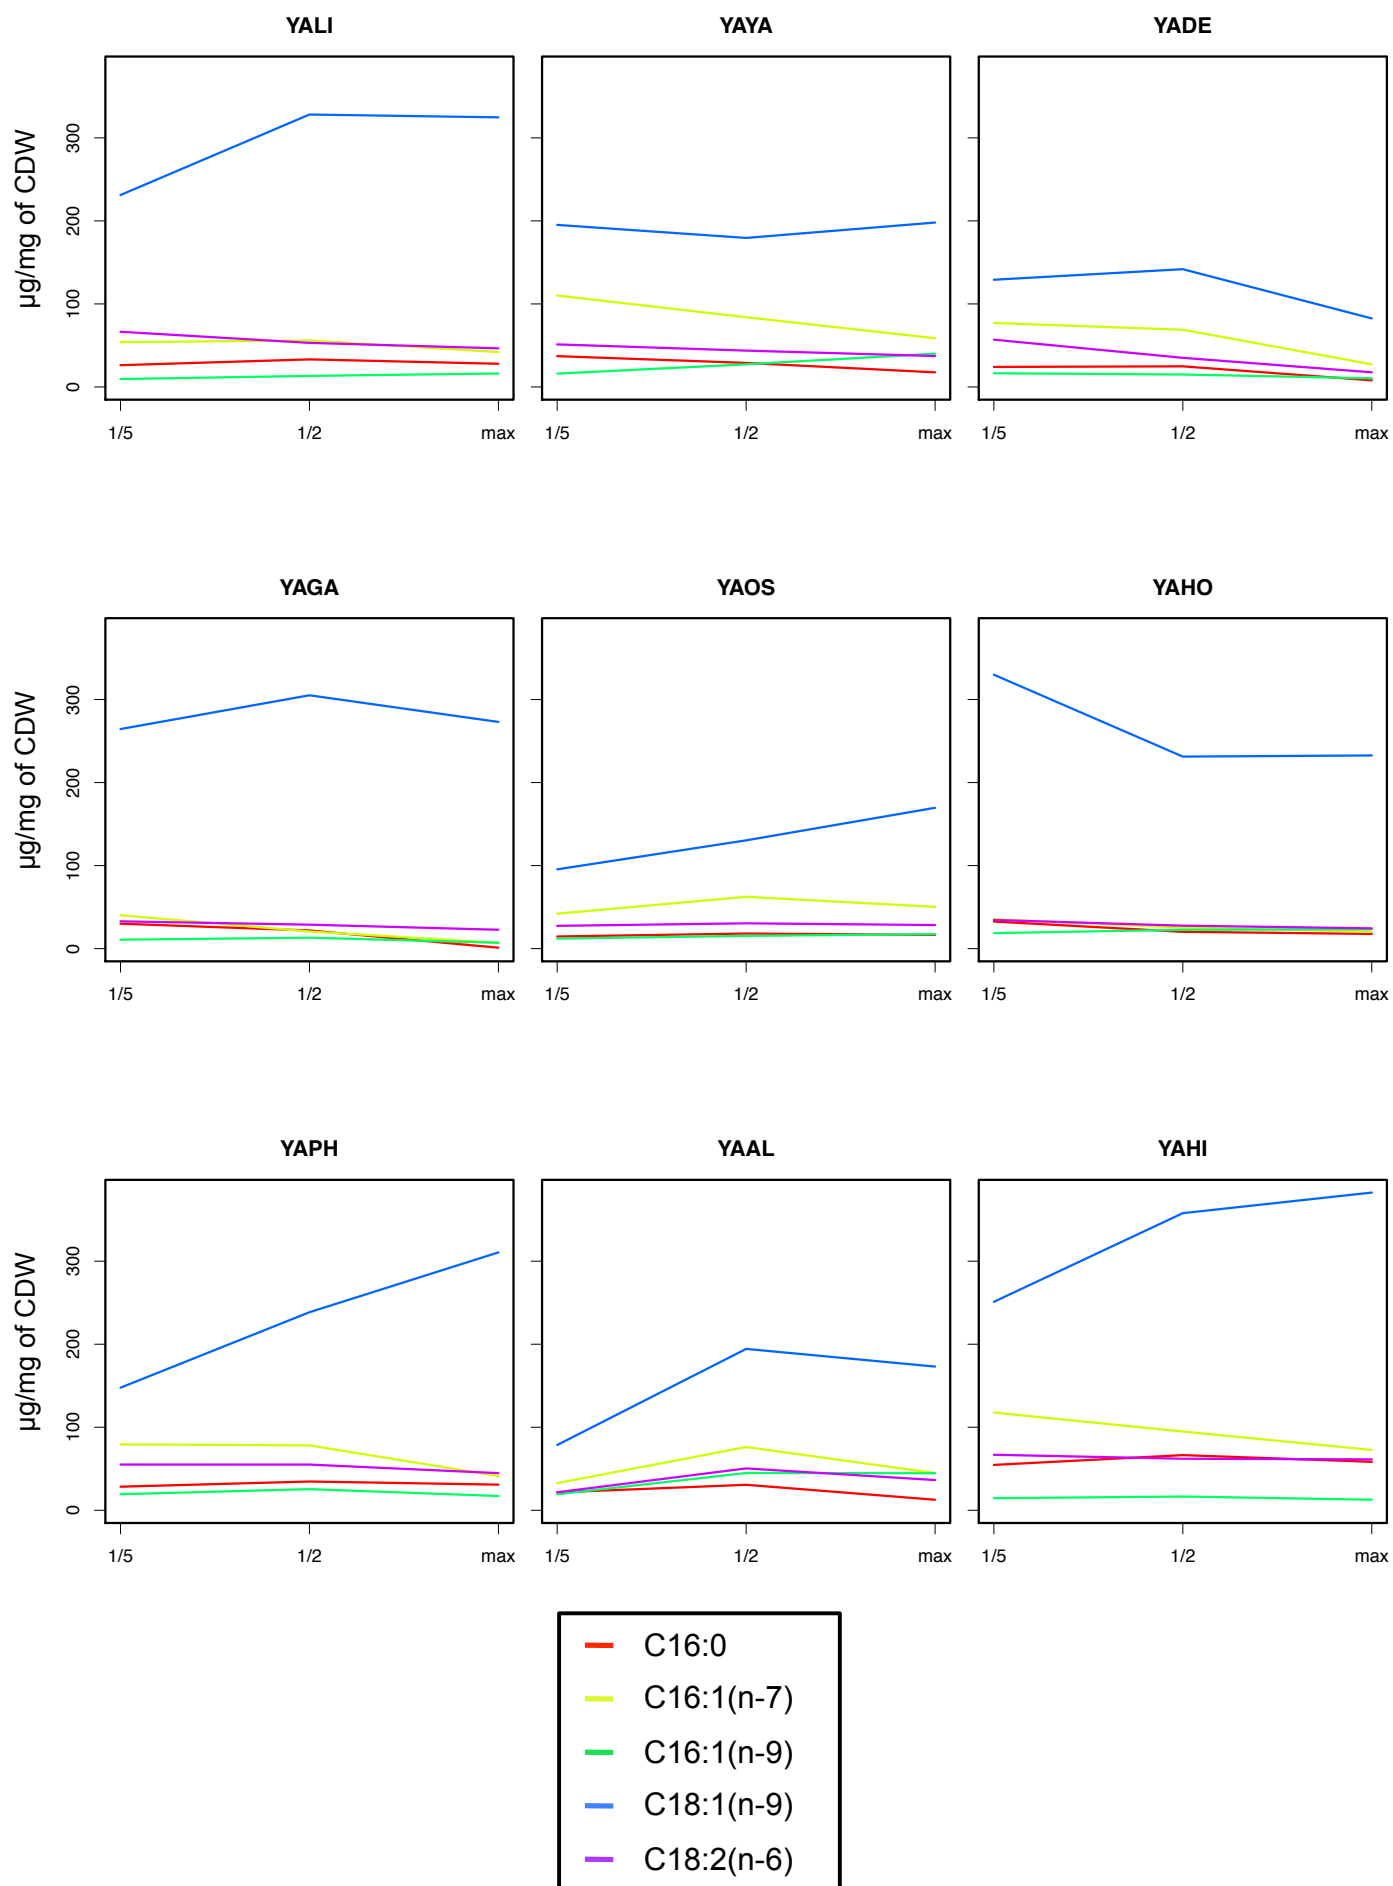

**B**

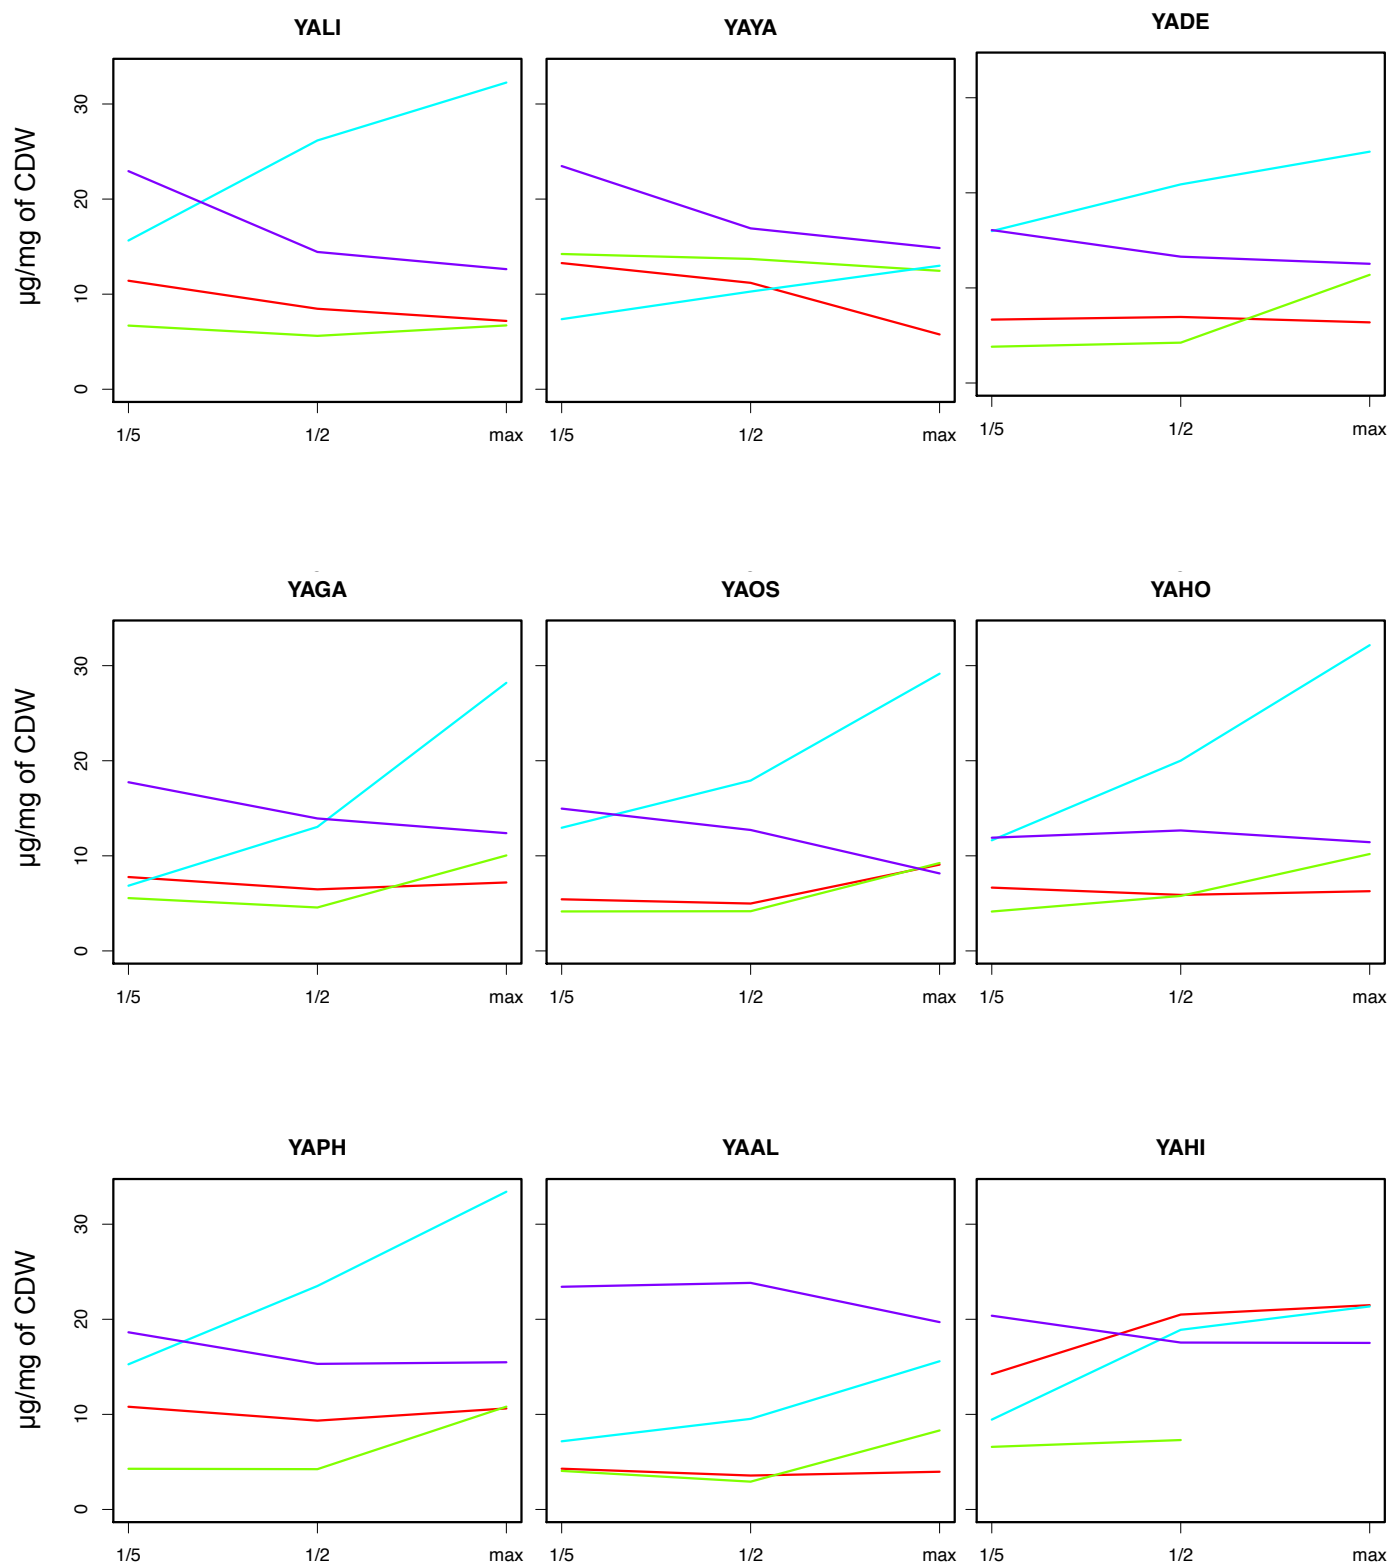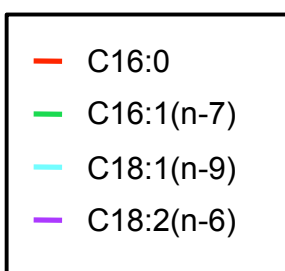

**Additional Figure S5:** Evolution of cellular lipid composition over time of strains grown on oleic acid (A) and glucose media (B). Quantities are in mg/g CDW. For each species, three different physiological states are represented: 1/5 of the log phase (1/5), 1/2 of the log phase (1/2) and maximum growth (max).
