# Supplementary material
Source: publisher figshare collection journal article supplement (https://plos.figshare.com/articles/dataset/_/699116)
Supplement: Supplementary file 1 [file 1 › Table_S1.xlsx]

## Sheet: Feuil1
Additional Table S1: Growth capacities of the species of the Yarrowia clade on non hydrophobic carbon compounds
	Y. lipolytica			C. yakushimensis		C. deformans			C. galli			C. oslonensis		C. phangngensis			C. hollandica			C. alimentaria		C. hispaniensis
	CBS7504 - W29			CBS10253		CBS2071			CBS9722			CBS10146		CBS10407			CBS4855			CBS10151		CBS9996
	API	CBS	Biotek	API	Biotek	API	CBS	Biotek	API	CBS	Biotek	API	Biotek	API	CBS	Biotek	API	CBS	Biotek	API	Biotek	API	Biotek
Levulinate	-			-		-			-	-		-		-			-			-		-
Arabinose	-	+	-	-	-	-	-	-	-	-	-	-	-	-	+	-	-	-	-	-	-	-	-
Cellobiose	-	-		-		-	-		-	-		-		-	-		-	-		-		-
Esculin ferric citrate	-			-		-			-			-		-			-			-		-
Galactose	-	-		-		-	-		-	w	-	-		-			-	-		-		-
Glucosamine	-	-		-		d	-	-	-	-		-		-			-	-		-		-
Inositol	-	-		-		-	-		-	-		-		-	-		-	-		-		-
Lactose	-	-		-		-	-		-	-		-		-	-		-	-		-		-
Maltose	-	-		-		-	-		-	w	-	-		-	-		-	-		-		-
Melezitose	-	-		-		-	-		-	-		-		-	-		-	-		-		-
Melibiose	-	-		-		-	-		-	-		-		-	-		-	-		-		-
Methyl α-D-glucopyranoside	-			-		-			-			-		-			-			-		-
Palatinose	-			-		-			-	w		-		-			-			-		-
Potassium-2-ketogluconate	-			-		-			-			-		-			-			-		-
Raffinose	-	-		-		-	-		-	-		-		-	-		-	-		-		-
Rhamnose	-	-		-		-	-		-	-		-		-	-		-	-		-		-
Ribose	-	+	-	-	-	d,w	d	-	-	-	-	-	-	-		-	-	-,d,w	-	d	-	-	-
Sucrose	-		-	-	-	-		-	-		-	-	-	-		-	-		-	-	-	-	-
Sodium glucuronate	-			-		-			-			-		-			-			-		-
Sorbose	-	-		-		-	-		-	+	-	-		-	+	-	-	d	-	-		-
Xylose	-	-	-	-	-	+	-	-	-	-	-	-	-	-		-	-	-	-	-	-	-	-
Cycloheximide	+	+		+		+	+		+	+		+		+	+		+	+		+		+
Glucose	+	+	+	+	+	+	+	+	+	+	+	+	+	+	+	+	+	+	+	+	+	+	+
Glycerol	+	+		+		+	+		+	-	+	+		+	+		+	+		+		+
Fructose			+		+			+			+		+			+			+		+		+
Mannitol	+	+		d		d	+	-	+	-	-	+		+	+		+	+		d		+
N-Acetyl-Glucosamine	+	-	+	+		+	-	+	-	-		+		-			+		+	+		-
Potassium gluconate	+			+		+			-			d,w		-			-			d		-
Sorbitol	-			d		d,w			d			+		-			-			+		d,w
Lactate	+	+		+		d,w	d,w,+		+	-	-	+		+	+		+	+		d		-
Erythritol	+	+		+		+	+		+	+		+		+	+		+	+		+		-
Trehalose	-	-		-		-	-		-	-		-		-	-		-	-		-		+
