# Supplementary material
Source: publisher figshare collection journal article supplement (https://plos.figshare.com/articles/dataset/_/699116)
Supplement: Supplementary file 1 [file 1 › Table_S2.xlsx]

## Sheet: Feuil1
	Additional Table S2: Primers used for amplification of the protein-coding genes.
	YALI gene	Primer name	Sequence
	YALI0B18722g	MS456_F	TTACACYGTGACAAGTGTG
		MS456_R	ATACCAGCCTTGGARATGGA
	YALI0B08756g	MS277_2F	AKGGTGTCAACTGGCGWGAT
		MS277_2R	CACCGCCTTGAACCAGTTG
	YALI0A00264g	MS444_F	CAACATYAAGGAHGGCCGATT
		MS444_R	CRATGTCCTTCTTGAGCTTCT
	YALI0B16434g	MS561_F	GATAACGAGGCAATTGCCAT
		MS561_R	GATTCGCACCATCCACAGG
	YALI0A02695g	FG598_F	GTGTGGTACKSTCACAACGG
		FG598_R	ACATCCTTGGCWTCCTGSCC
	YALI0D11220g	FG610_1F	TTCAAGCAGGGATAYCAGAC
		FG610_R	ACACCRTCATCAATGGCYCGC
	YALI0C09141g	EF1U1	CCACTGGTCACCTTATCTAC
		EF1F1	AACGGTCTGTCGCATGTCTC
	Degenerate primers were used to allow PCR amplification of the YALI homologues in each of the eight species of the Yarrowia clade
