# Supplementary material
Source: publisher figshare collection journal article supplement (https://plos.figshare.com/articles/dataset/_/699116)
Supplement: Supplementary file 1 [file 1 › Table_S3.xlsx]

## Sheet: Feuil1
Additional Table S3: Presence of halo on solid hydrophobic media
Strainsa	tributyrin (C4)		methyl decanoate (C10)		oleic acid (C18:1)		triolein (C18:1)
	YN	YP	YN	YP	YN	YP	YN	YP
YALI	++	+	+++	-	-	++	-	-
YAYA	-	-	-	-	-	-	-	-
YADE	+/-	++	-	-	-	-	-	-
YAGA	-	-	-	-	-	++	-	-
YAOS	++	++	-	-	-	-	-	-
YAHO	++	+	-	-	-	+	-	-
YAPH	+	+++	+/-	++	-	++	-	+
YAAL	+	-	-	-	-	-	-	+
YAHI	-	-	+/-	++	-	-	-	-
a) Strains are indicated as: YALI = Y. lipolytica W29, YAKU = C. yakushimensis CBS10253, YADE = C. deformans CBS2071, YAGA = C. galli CBS9722, YAOS = C. oslonensis CBS10146, YAHO = C. hollandica CBS4855, YAPH = C. phangngensis CBS10407, YAAL = C. alimentaria CBS10151, YAHI = C. hispaniensis CBS9996
