# Supplementary material
Source: publisher figshare collection journal article supplement (https://plos.figshare.com/articles/dataset/_/699116)
Supplement: Supplementary file 1 [file 1 › Table_S4.xlsx]

## Sheet: Feuil1
Additional Table S4: Characteristic of growth cultures over time in oleic acid and glucose media: time points, optical density, lipid content and cell dry weight.
Strains	Physiolo- gical stages	Oleic acid				Glucose
		Time	Mean	Mean lipid content	Cell dry weight*	Time	Mean	Mean lipid content	Cell dry weight*
		(hour)	OD	(% CDW)	(mg)	(hour)	OD	(% CDW)	(mg)
YALI	1/5	8.2	8.4 (±0.1)	41.9 (±2.0)	5.3 (±0.4)	8.1	5.6	5.9 (±0.1)	6.3 (±0.3)
	1/2	17.3	30.4	52.2 (±0.6)	4.5 (±0.1)	10.7	12.4 (±0.4)	5.7	6.2
	Max	25.3	34.3 (±1.9)	48.9 (±0.7)	5.0 (±0.2)	15.0	18.6 (±0.2)	5.9	5.5 (±0.1)
YADE	1/5	7.8	8.1 (±1.9)	34.4 (±3.0)	5.3 (±0.2)	9.8	8.3 (±1.4)	4.6 (±0.4)	6.2 (±0.3)
	1/2	14.6	19.1 (±0.4)	31.4 (±0.4)	5.1 (±0.1)	11.7	15.1 (±1.7)	4.6 (±0.4)	5.1 (±0.5)
	Max	25.1	29.5 (±0.1)	15.2 (±1.9)	4.4	15.0	16.0 (±0.7)	5.5 (±0.2)	5.9 (±0.2)
YAGA	1/5	10.2	5.7 (±0.4)	42.7 (±1.8)	6.3 (±0.1)	8.7	3.8	3.9 (±0.1)	6.6
	1/2	25.3	9.7 (±2.2)	44.5 (±2.9)	11.6 (±2.0)	11.4	8.9 (±0.1)	3.8 (±0.2)	5.7 (±0.2)
	Max	36	18.9 (±0.5)	37.9	9.0 (±0.4)	16.0	21.0 (±0.6)	6.3 (±0.4)	5.1
YAYA	1/5	9.7	3.6 (±0.3)	45.3 (±1.6)	6.7 (±0.1)	8.8	5.4 (±0.2)	6.0 (±0.3)	7.3 (±0.2)
	1/2	17.1	15.6 (±0.6)	39.0 (±0.7)	5.1 (±0.1)	10.7	9.8 ±(0.1)	5.2 (±0.4)	6.2 (±0.3)
	Max	26.4	24.5 (±0.8)	36.5 (±0.5)	3.5 (±0.3)	15.0	18.4 (±0.2)	4.7 (±0.2)	5.8
YAOS	1/5	8.6	2.4 (±0.2)	21.0 (±1.6)	5.5 (±0.4)	9.5	3.7 (±0.9)	3.8 (±0.7)	7.0
	1/2	16.3	14.9 (±0.1)	27.4 (±0.2)	5.2 (±0.2)	11.5	7.9 (±1.7)	4.0	5.5 (±0.2)
	Max	28.7	15.2 (±1.3)	29.4 (±1.1)	4.4 (±0.3)	16.0	11.9 (±0.6)	5.6 (±0.4)	5.9 (±0.2)
YAPH	1/5	7.5	11.4 (±0.5)	38.4 (±0.6)	4.8 (±0.1)	7.5	6.7 (±0.2)	5.6 (±0.2)	6.0 (±0.2)
	1/2	15.5	26.9 (±2.3)	45.8 (±1.0)	3.6 (±0.3)	9.5	11.3 (±0.1)	5.6 (±0.2)	5.6
	Max	21.1	21.4 (±0.5)	49.3 (±0.7)	7.1	14.1	21.4 (±0.5)	7.0 (±0.3)	5.1
YAHO	1/5	15.9	12.2 (±0.3)	50.7 (±0.1)	9.4 (±0.5)	9.1	7.8 (±0.1)	3.6 (±1.0)	6.5 (±0.2)
	1/2	21.8	30.2 (±1.9)	36.1 (±1.6)	5.1 (±0.5)	11.5	16.0 (±0.5)	4.5	5.4
	Max	33.5	22.8 (±0.1)	35.0 (±4.6)	6.2 (±0.3)	15.1	20.9 (±0.3)	6.5 (±0.4)	5.4
YAAL	1/5	11.0	2.8 (±0.5)	18.2 (±2.9)	9.9 (±0.6)	14.0	7.5 (±0.6)	4.0 (±0.3)	6.0 (±0.1)
	1/2	17.0	18.5 (±0.8)	42.8 (±0.8)	4.6	15.8	10.2	4.1 (±0.1)	5.9 (±0.2)
	Max	25.7	23.2 (±1.0)	32.3 (±2.3)	4.7 (±0.3)	24.7	24.9 (±0.9)	4.5 (±0.7)	3.9(±0.2)
YAHI	1/5	9.5	15.4 (±0.5)	57.0 (±1.8)	3.4	11.7	7.5 (±0.8)	5.1 (±0.2)	4.9 (±0.3)
	1/2	15.8	33.7 (±0.9)	67.1 (±1.2)	3.5 (±0.2)	13.8	17.3 (±0.7)	6.4 (±0.2)	4.4 (±0.1)
	Max	23.2	41.6 (±3.7)	64.6 (±3.5)	4.4 (±0.3)	16.0	19.7 (±0.6)	7.2 (±0.2)	3.7 (±0.1)
* Cell dry weight is given for an equivalent of 10 0D600.
The absolute deviation to the mean is given within brackets when different from ±0.0
