# Supplementary material
Source: publisher figshare collection journal article supplement (https://plos.figshare.com/articles/dataset/_/699116)
Supplement: Supplementary file 1 [file 1 › Table_S5.xls]

## Sheet: data_lipid_all_CompositionQuant
	Additional Table S5: Profile of fatty acid accumulation (% of CDW) on glucose and oleic acid media.
	Strain	Stage	C16:0	C16:1(n-7)	C16:1(n-9)	C18:1(n-9)	C18:1(n-9)t	C18:2(n-6)
	Oleic acid
	YALI	1/5	2.6 (±0.1)	5.4 (±0.2)	1.0	23.1 (±1.1)	1.0	6.6 (±0.1)
		1/2	3.3	5.6	1.3	32.8 (±0.5)	1.6	5.3
		max	2.8 (±0.2)	4.2 (±0.1)	1.6	32.5 (±0.4)	1.4	4.6
	YADE	1/5	2.4 (±0.1)	7.7 (±0.4)	1.7 (±0.2)	12.9 (±1.4)	0.5	5.7 (±0.6)
		1/2	2.5	6.9	1.5	14.2 (±0.2)	0.5 (±0.1)	3.5
		max	0.8 (±0.2)	2.7 (±0.3)	1.0 (±0.1)	8.3 (±1.0)	0.3	1.8 (±0.2)
	YAGA	1/5	3.0	4.0	1.1	26.4 (±1.2)	1.3 (±0.1)	3.3 (±0.1)
		1/2	2.2	2.1	1.3 (±0.2)	30.5 (±2.3)	1.8 (±0.2)	2.9 (±0.3)
		max	0.1	0.7	0.7	27.3 (±0.1)	0.9	2.3 (±0.1)
	YAYA	1/5	3.7 (±0.1)	11 (±0.4)	1.6 (±0.1)	19.5 (±0.9)	0.8 (±0.1)	5.1 (±0.3)
		1/2	2.9	8.4	2.7 (±0.1)	17.9 (±0.5)	0.5	4.4 (±0.1)
		max	1.8	5.9 (±0.3)	4.0	19.8 (±0.1)	0.6	3.7
	YAOS	1/5	1.5 (±0.1)	4.2 (±0.2)	1.2	9.5 (±1.3)	0.4 (±0.2)	2.7
		1/2	1.8 (±0.1)	6.2 (±0.3)	1.5 (±0.1)	13.0 (±0.7)	0.5	3.0
		max	1.7 (±0.2)	5.0 (±0.5)	1.7 (±0.2)	17.0 (±0.4)	0.5	2.8 (±0.1)
	YAPH	1/5	2.8	7.9 (±0.1)	1.9	14.8 (±0.2)	0.6	5.5 (±0.3)
		1/2	3.5	7.8 (±0.6)	2.5 (±0.2)	23.9 (±0.9)	1.0 (±0.3)	5.5
		max	3.1 (±0.1)	4.1 (±0.2)	1.7 (±0.2)	31.1 (±0.4)	1.5	4.5
	YAHO	1/5	3.3 (±0.1)	3.6	1.9 (±0.2)	33.0	1.9 (±0.1)	3.4
		1/2	2.0	2.5 (±0.2)	2.3 (±0.1)	23.1 (±1.2)	1.2 (±0.1)	2.8 (±0.2)
		max	1.8 (±0.1)	2.0 (±0.4)	2.3 (±0.5)	23.3 (±3.8)	1.0 (±0.3)	2.4 (±0.2)
	YAAL	1/5	2.2 (±0.2)	3.3 (±0.5)	1.9	7.9 (±2.2)	0.0	2.2
		1/2	3.1 (±0.1)	7.6 (±0.2)	4.5	19.4 (±0.2)	0.9	5.0
		max	1.3 (±0.2)	4.5 (±0.4)	4.5 (±0.1)	17.3 (±1.4)	0.5	3.6 (±0.1)
	YAHI	1/5	5.5 (±0.3)	11.8 (±0.4)	1.5 (±0.1)	25.1 (±0.6)	0.8	6.7 (±0.3)
		1/2	6.6 (±0.1)	9.5 (±0.4)	1.7	35.8 (±0.1)	1.5	6.2 (±0.2)
		max	5.8 (±0.1)	7.3	1.3	38.3 (±2.8)	1.7 (±0.1)	6.1 (±0.1)
	Glucose
	YALI	1/5	1.1 (±0.1)	0.7	0.1	1.6	0.0	2.3
		1/2	0.8	0.6	0.1	2.6 (±0.1)	0.0	1.4 (±0.1)
		max	0.7	0.7 (±0.1)	0.0	3.2 (±0.1)	0.0	1.3 (±0.1)
	YADE	1/5	0.7 (±0.1)	0.4	0.0	1.6 (±0.3)	0.1	1.6 (±0.1)
		1/2	0.7 (±0.1)	0.4	0.0	2.1 (±0.4)	0.1	1.3 (±0.1)
		max	0.6 (±0.1)	1.1 (±0.2)	0.0	2.4 (±0.1)	0.0	1.3
	YAGA	1/5	0.8	0.6	0.0	0.7	0.0	1.8 (±0.1)
		1/2	0.6 (±0.1)	0.5 (±0.1)	0.0	1.3 (±0.1)	0.0	1.4
		max	0.7	1.0	0.0	2.8 (±0.1)	0.0	1.2
	YAYA	1/5	1.3 (±0.1)	1.4	1.7	0.7	0.0	2.3 (±0.1)
		1/2	1.1	1.4 (±0.1)	0.0	1.0 (±0.2)	0.0	1.7 (±0.1)
		max	0.6	1.2	0.1	1.3 (±0.1)	0.0	1.5
	YAOS	1/5	0.5 (±0.1)	0.4 (±0.1)	0.0	1.3 (±0.4)	0.0	1.5 (±0.1)
		1/2	0.5	0.4	0.0	1.8 (±0.2)	0.0	1.3 (±0.2)
		max	0.9	0.9 (±0.1)	0.0	2.9 (±0.1)	0.0	0.8 (±0.1)
	YAPH	1/5	1.1	0.4	0.0	1.5	0.2 (±0.1)	1.9
		1/2	0.9	0.4	0.0	2.4 (±0.2)	0.2	1.5 (±0.1)
		max	1.1	1.1 (±0.1)	0.0	3.3 (±0.3)	0.0	1.5 (±0.1)
	YAHO	1/5	0.7	0.4 (±0.2)	0.0	1.2 (±0.4)	0.2	1.2 (±0.4)
		1/2	0.6	0.6	0.0	2.0 (±0.1)	0.0	1.3 (±0.1)
		max	0.6	1.0	0.0	3.2 (±0.1)	0.0	1.1 (±0.2)
	YAAL	1/5	0.4	0.4 (±0.1)	0.1	0.7	0.0	2.3 (±0.1)
		1/2	0.4 (±0.1)	0.3 (±0.1)	0.1	1.0	0.0	2.4 (±0.1)
		max	0.4 (±0.1)	0.8	0.3	1.6 (±0.1)	0.0	2.0 (±0.2)
	YAHI	1/5	1.4	0.7	0.0	0.9 (±0.2)	0.0	2.0 (±0.1)
		1/2	2.0	0.7 (±0.1)	0.0	1.9 (±0.1)	0.0	1.8 (±0.1)
		max	2.1 (±0.1)	0.0	1.1 (±0.1)	2.1 (±0.1)	0.1	1.8
	The absolute deviation to the mean is given within brackets when different from ±0.0
